# Supplementary material for: Following carbon condensation by in situ TEM: towards a rational understanding of the processes in the synthesis of nitrogen-doped carbonaceous materials
Source: Royal Society of Chemistry journal article supplement (doi:10.1039/d2ta05247d), 2022-01-01
Supplement: d2ta05247d1.pdf [file d2ta05247d1.pdf]

## Supporting Information

**Following carbon condensation by in-situ TEM: Towards a rational understanding of the processes in the synthesis of nitrogen-doped carbonaceous materials**

*D. Piankova et al.*

## Experimental

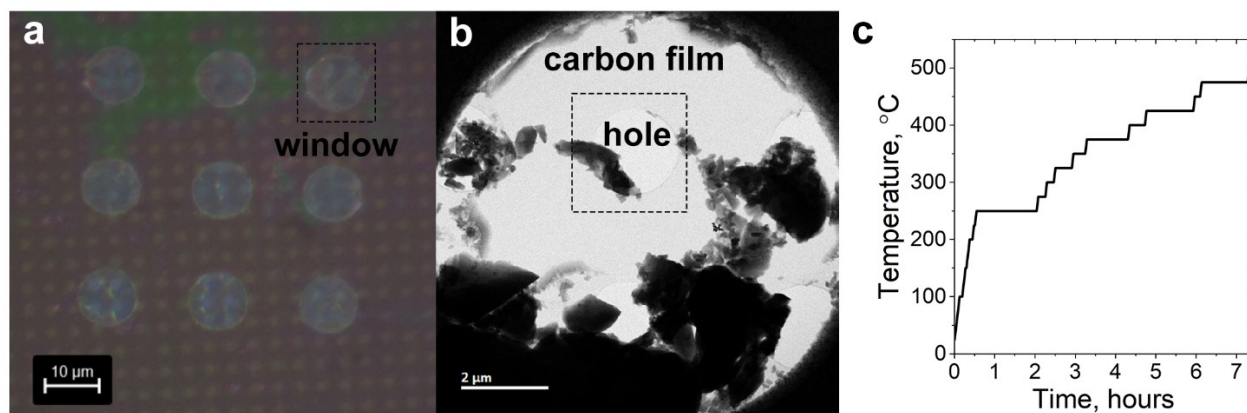

**Fig. S1.** a) light microscopy image of the the heating chip window; 2) enlargement of the window showing the overview of the deposited sample before the heating, recorded in STEM using SE and BF detector. Heating ramp for the in-situ STEM heating experiment

## 1. Characterization of the precursor

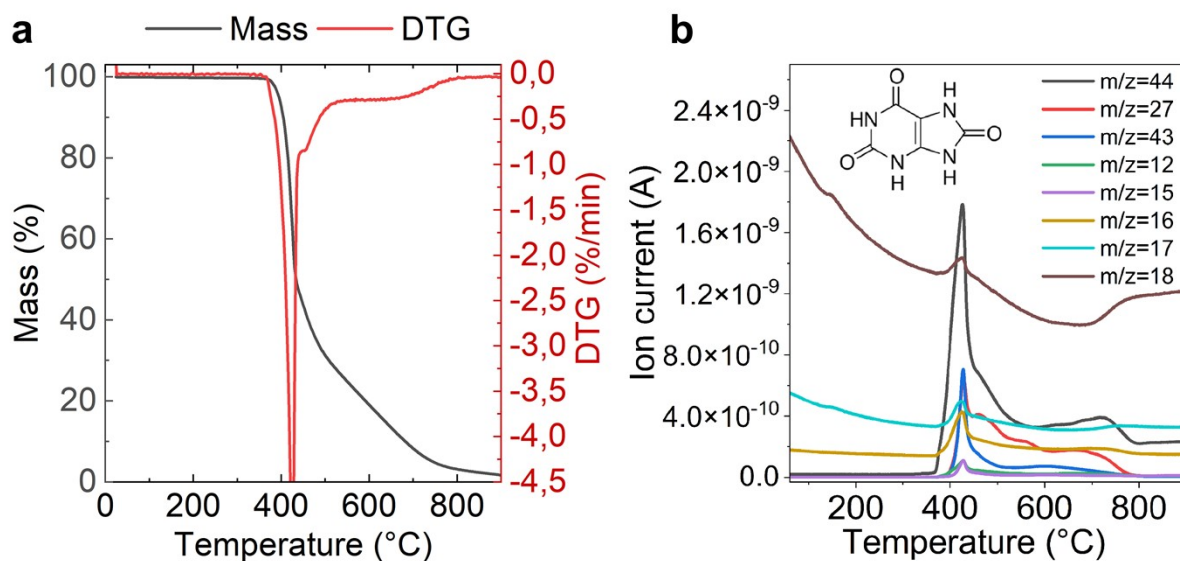

**Fig. S2.** a) TGA of uric acid in nitrogen atmosphere, b) TGA-MS results of uric acid in nitrogen atmosphere, possibly ascribed signals  $m/z=44$ :  $\text{CO}_2^+$ ,  $\text{N}_2\text{O}^+\text{CN}_2\text{H}_4^+$ ,  $\text{CNOH}_2^+$ ,  $\text{C}_2\text{H}_4\text{O}^+$ ,  $m/z=27$ :  $\text{HCN}^+$ ,  $m/z=43$ :  $\text{CNOH}^+$ ,  $\text{CN}_2\text{H}_3^+$ ,  $\text{C}_2\text{NH}_5^+$ ,  $\text{C}_2\text{OH}_3^+$ ,  $m/z=12$ :  $\text{C}^+$ ,  $m/z=15$ :  $\text{CH}_3^+$ ,  $\text{NH}^+$ ,  $m/z=16$ :  $\text{O}^+$ ,  $\text{NH}_2^+$ ,  $\text{CH}_4^+$ ,  $m/z=17$ :  $\text{OH}^+$ ,  $\text{NH}_3^+$ ,  $m/z=18$ :  $\text{H}_2\text{O}^+$ .

## 2. Synthesis in nitrogen atmosphere

**Table S1.** The samples used in the manuscript.

| Sample name<br>UA"temperature"-“gas”-<br>“heating rate” | temperature<br>[°C] | atmosphere | pressure<br>[bar]    | heating rate<br>[K/min] |
|---------------------------------------------------------|---------------------|------------|----------------------|-------------------------|
| UA500-N <sub>2</sub> -1                                 | 500                 | nitrogen   | 1                    | 1                       |
| UA700-N <sub>2</sub> -1                                 | 700                 | nitrogen   | 1                    | 1                       |
| UA800-N <sub>2</sub> -1                                 | 800                 | nitrogen   | 1                    | 1                       |
| UA400-vac-1                                             | 400                 | vacuum     | 1.5*10 <sup>-4</sup> | 1                       |
| UA500-vac-1                                             | 500                 | vacuum     | 1.5*10 <sup>-4</sup> | 1                       |
| UA500-vac-10                                            | 500                 | vacuum     | 1.5*10 <sup>-4</sup> | 10                      |

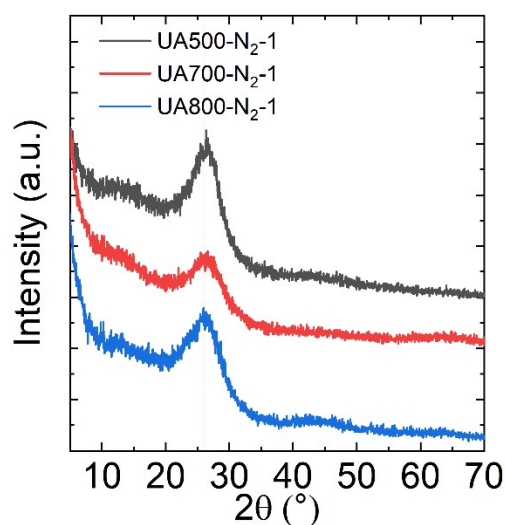

**Fig. S3.** XRD pattern of UA500-N<sub>2</sub>-1, UA700-N<sub>2</sub>-1, and UA800-N<sub>2</sub>-1.

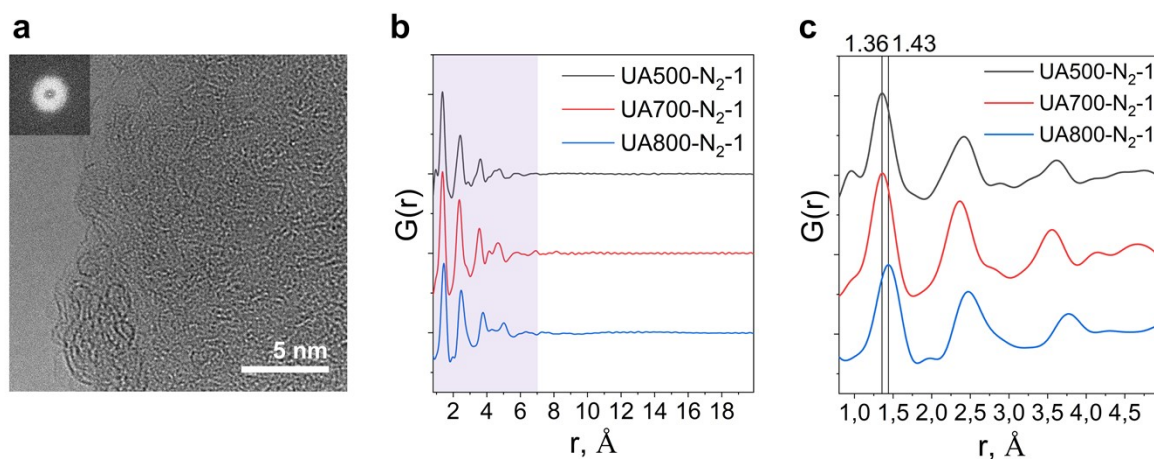

**Fig. S4.** a) HRTEM and FFT transform (inset) of the corresponding area of the sample UA700-N<sub>2</sub>-1; eRDF (electron reduced density function) analysis of the samples synthesized at 500, 700 and 800 °C in nitrogen atmosphere: b) EF-eRDFs, purple rectangular shows the region where the short-range order is present c) enlargement of the short-range order.

The point of the extinction of the peaks in EF-eRDF shows the length of the short-range order (**Fig. S4 b**), which is approximately 7 Å for all the materials. To get quantitative information about bonding in the short-range order, we analyzed the peak positions in the eRDF. The first neighbor-neighbor distance for the sample UA500-N<sub>2</sub>-1 and UA700-N<sub>2</sub>-1 is 1.36 Å, which is shorter in contrast to the UA800-N<sub>2</sub>-1 sample, where the distance is 1.42-1.43 Å, corresponding

to the typical carbon-carbon distance in amorphous carbonaceous materials<sup>1</sup>. Shorter distances in the first coordination sphere indicate the presence of mostly carbon-nitrogen bonds in the network. These findings go along with the compositional analysis: samples UA500-N<sub>2</sub>-1 and UA700-N<sub>2</sub>-1 demonstrate higher nitrogen content than UA800-N<sub>2</sub>-1 (**Table 1**). Thus, EF-eRDF analysis showed that the samples demonstrate the same length of short-range order of 7 Å with the only difference in the first neighbor-neighbor distance arising from the difference in the composition.

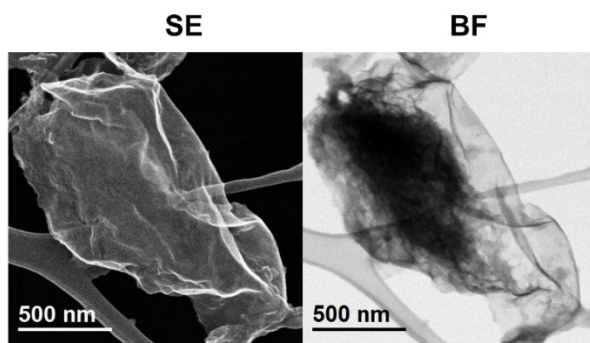

**Fig. S5.** Secondary electron (SE) and bright-field (BF) STEM images of the sample UA800-N<sub>2</sub>-1.

### 3. *In-situ scanning transmission electron microscopy*

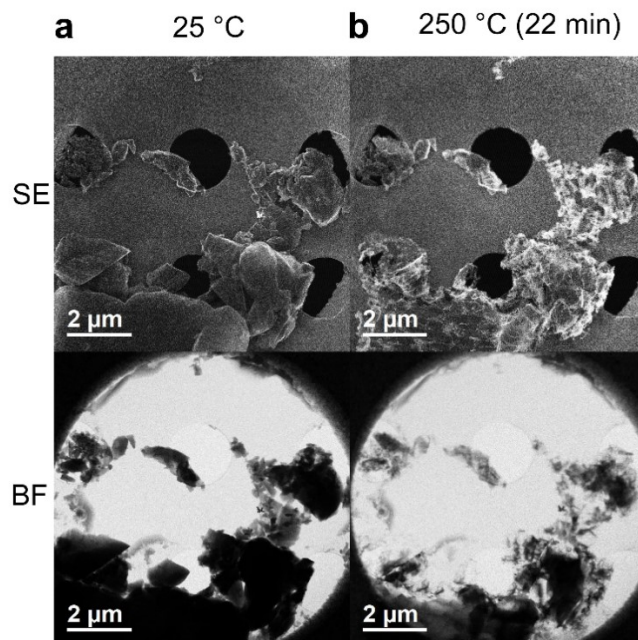

**Fig. S6.** Secondary electron and bright-field STEM images of: a) specimen before the in-situ heating experiment, b) at 250 °C after isothermal heating for 22 minutes.

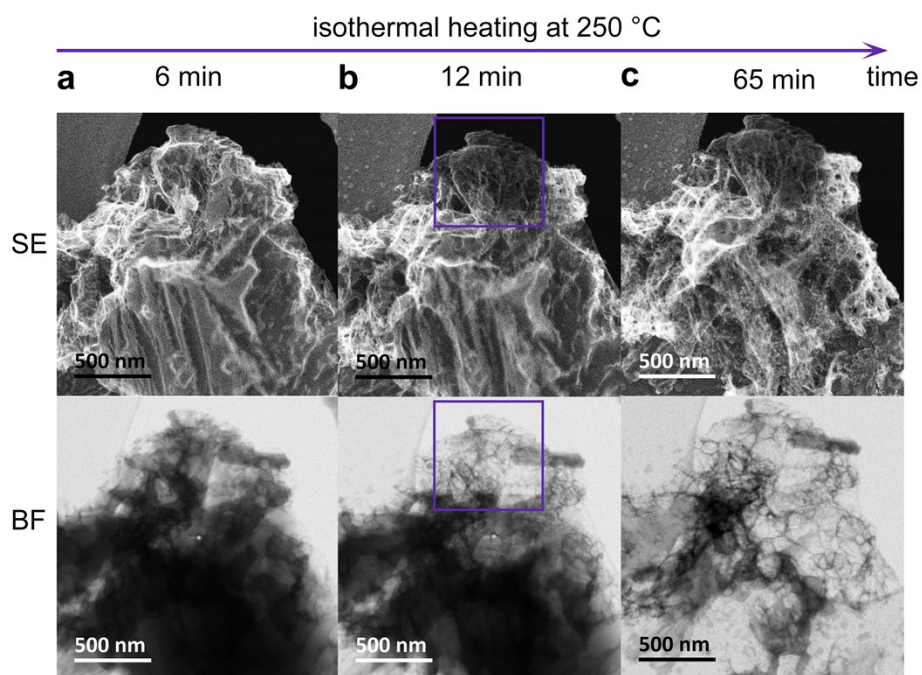

**Fig. S7.** Secondary Electron and bright-field STEM images of the particle during the isothermal heating at 250 °C a) after 6 minutes; b) after 12 minutes (the area in the rectangular was imaged at higher magnification); c) after 65 minutes. The particle got emptied faster in the imaged area of interest (b –



in rectangular), however, after isothermal heating for 65 minutes without any exposure to the electron beam particle looked emptied in almost all the areas.

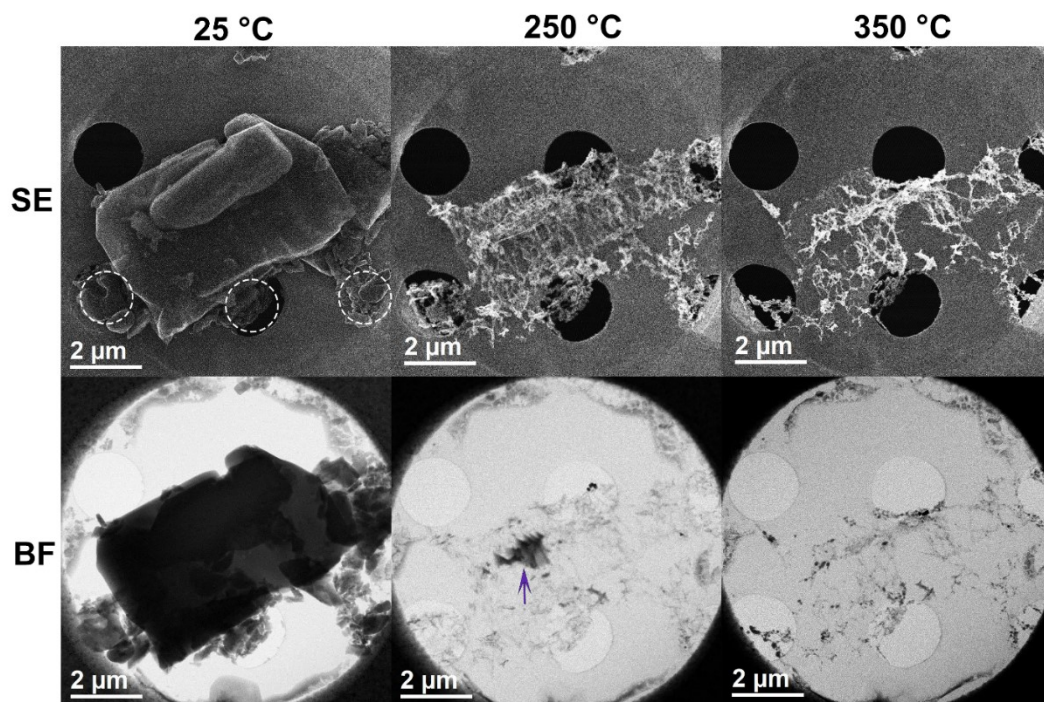

**Fig. S8.** Secondary Electron and bright-field STEM images of the shrinkage of particles from 25 to 350 °C. The small particles shown in white dotted circles (SE STEM image at 25 °C) slightly shrank from 25 to 250 °C and more considerably from 250 to 350 °C.

#### 4. Optimization of the synthesis using vacuum

**Table S2.** Samples synthesized in vacuum to determine the condensation temperature.

| Sample name<br>UA"temperature"-“gas”-<br>“heating rate” | temperature<br>[°C] | atmosphere | pressure<br>[bar]   | heating rate<br>[K/min] |
|---------------------------------------------------------|---------------------|------------|---------------------|-------------------------|
| UA250-vac-10                                            | 250                 | vacuum     | $1.5 \cdot 10^{-4}$ | 10                      |
| UA325-vac-10                                            | 325                 | vacuum     | $1.5 \cdot 10^{-4}$ | 10                      |
| UA375-vac-10                                            | 375                 | vacuum     | $1.5 \cdot 10^{-4}$ | 10                      |
| UA500-vac-10                                            | 500                 | vacuum     | $1.5 \cdot 10^{-4}$ | 10                      |

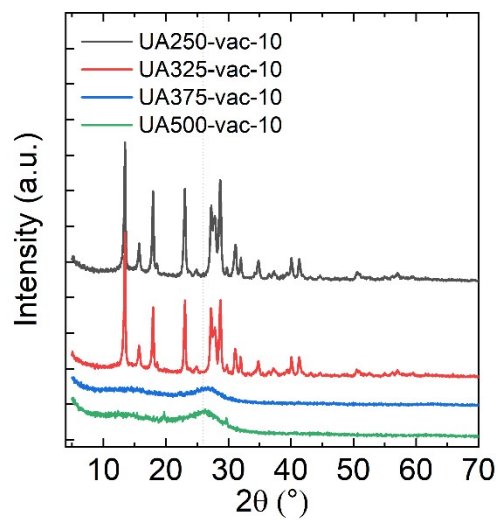

**Fig. S9.** Determination of the condensation temperature in vacuum by XRD.

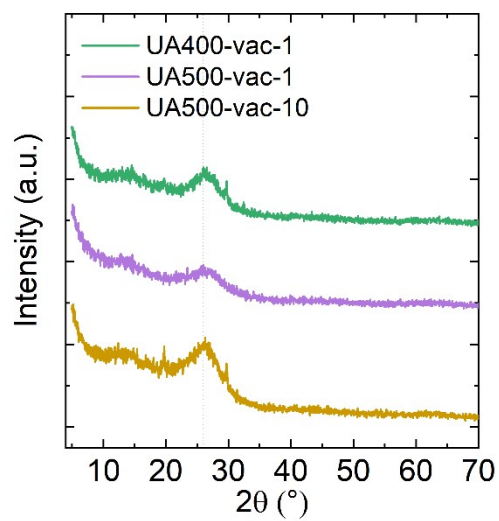

**Fig. S10.** XRD of the samples carbonized in vacuum.



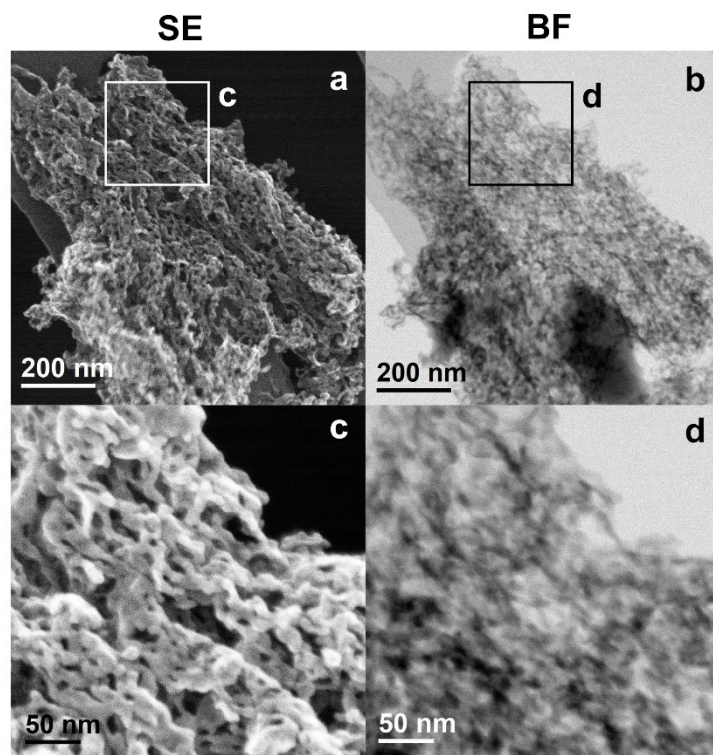

**Fig. S11.** Secondary electron (SE) and bright-field images (BF) of the sample UA400-vac-1.

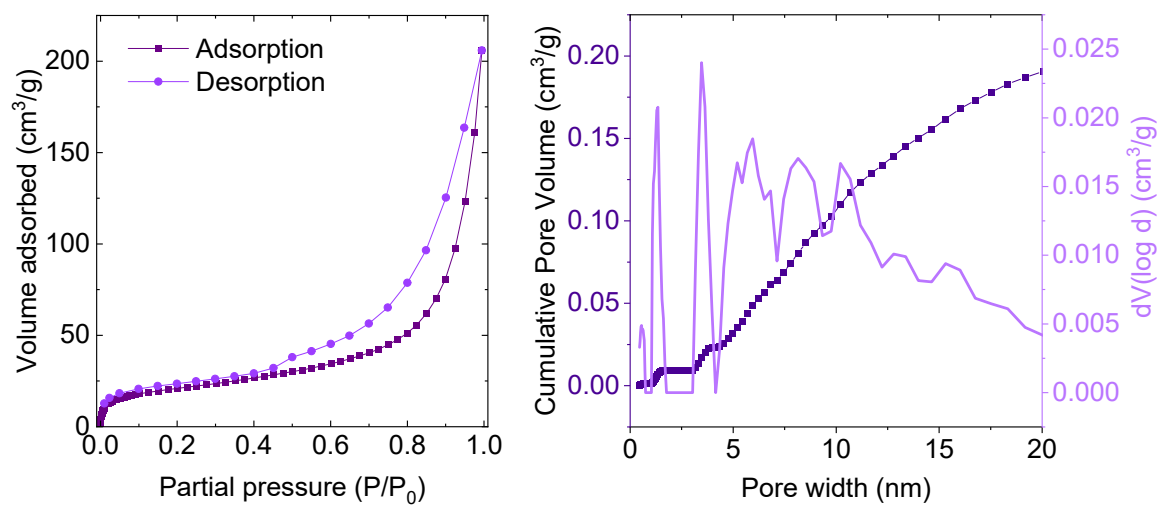

**Figure S12.** (Left) Ar adsorption/desorption isotherm recorded at 87K and (right) NLDFT pore size distribution obtained by applying the kernel to the adsorption branch (slit pores) of UA500-vac-1.

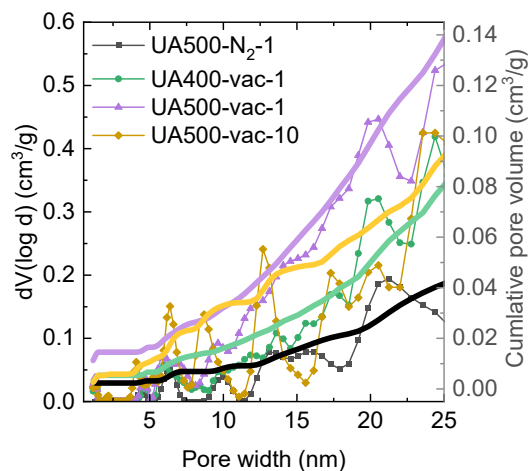

**Figure S13.** Pore size distribution of samples UA500-N<sub>2</sub>-1, UA400-vac-1, UA500-vac-1, and UA500-vac-10 obtained by applying the NLDFT (slit pore pores) to the adsorption branch of N<sub>2</sub> adsorption/desorption isotherms at 77K.

### 5. Selectivity and heat of adsorption

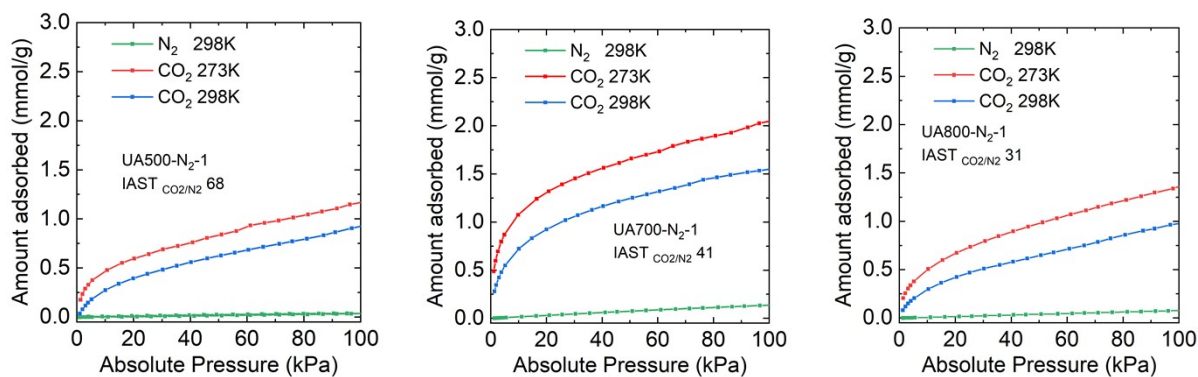

**Fig. S14.** IAST values calculated from CO<sub>2</sub> and nitrogen adsorption isotherms at 298 K of samples prepared in nitrogen atmosphere.

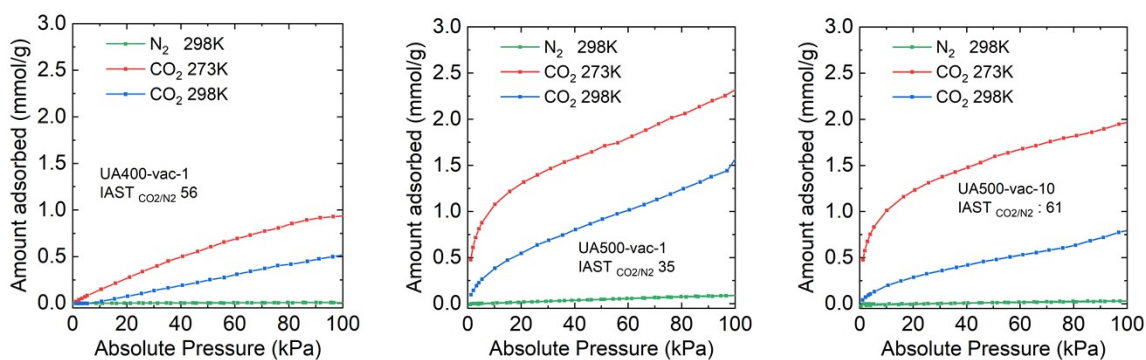

**Fig. S15.** IAST values calculated from isotherms vacuum samples.

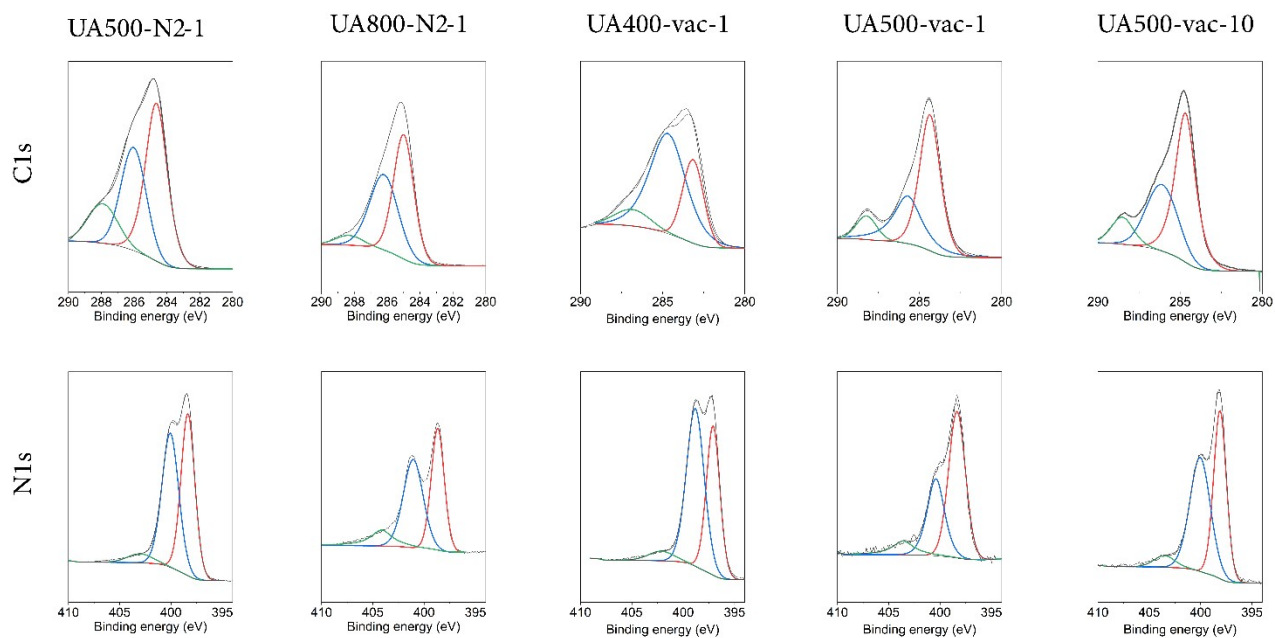

**Fig. S16.** Deconvoluted  $C1s$  and  $N1s$  XPS spectra. Pyridinic nitrogen is shown in red, pyrrolic - in blue, and quaternary - in green.

## References

- 1 V. Petkov, R. G. Difrancesco, S. J. L., *Philosophical Magazine B*, 1999, **79**, 1519–1530.
